# Supplementary material for: Development of an electrochemical sensor based on a cobalt oxide/tin oxide composite for determination of antibiotic drug ornidazole
Source: Royal Society of Chemistry journal article supplement (doi:10.1039/d1nj01345a), 2021-01-01
Supplement: d1nj01345a1.pdf [file d1nj01345a1.pdf]

**Development of an electrochemical sensor based on a cobalt oxide/tin oxide composite for determination of antibiotic drug ornidazole†**

Chelliah Koventhan, Venkatachalam Vinothkumar, Shen-Ming Chen\*

Department of Chemical Engineering and Biotechnology, College of Engineering, National Taipei University of Technology, No. 1, Chung-Hsiao East Road, Section 3, Taipei 10608, Taiwan.

**\*Corresponding Author:**

E-mail: [smchen78@ms15.hinet.net](mailto:smchen78@ms15.hinet.net) (S-M Chen),

Fax: +886 2270 25238; Tel: +886 2270 17147.

Number of pages: 05

Number of figures: 05

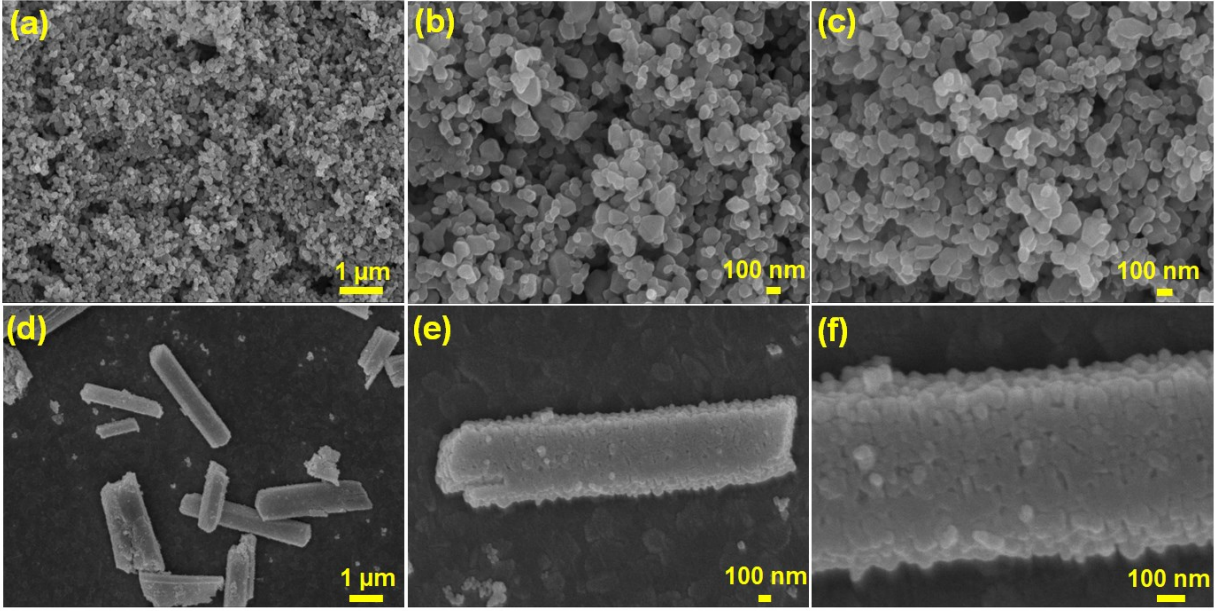

**Fig. S1.** Typical FESEM images of (a–c) Co<sub>3</sub>O<sub>4</sub>, and (d–f) SnO<sub>2</sub>.

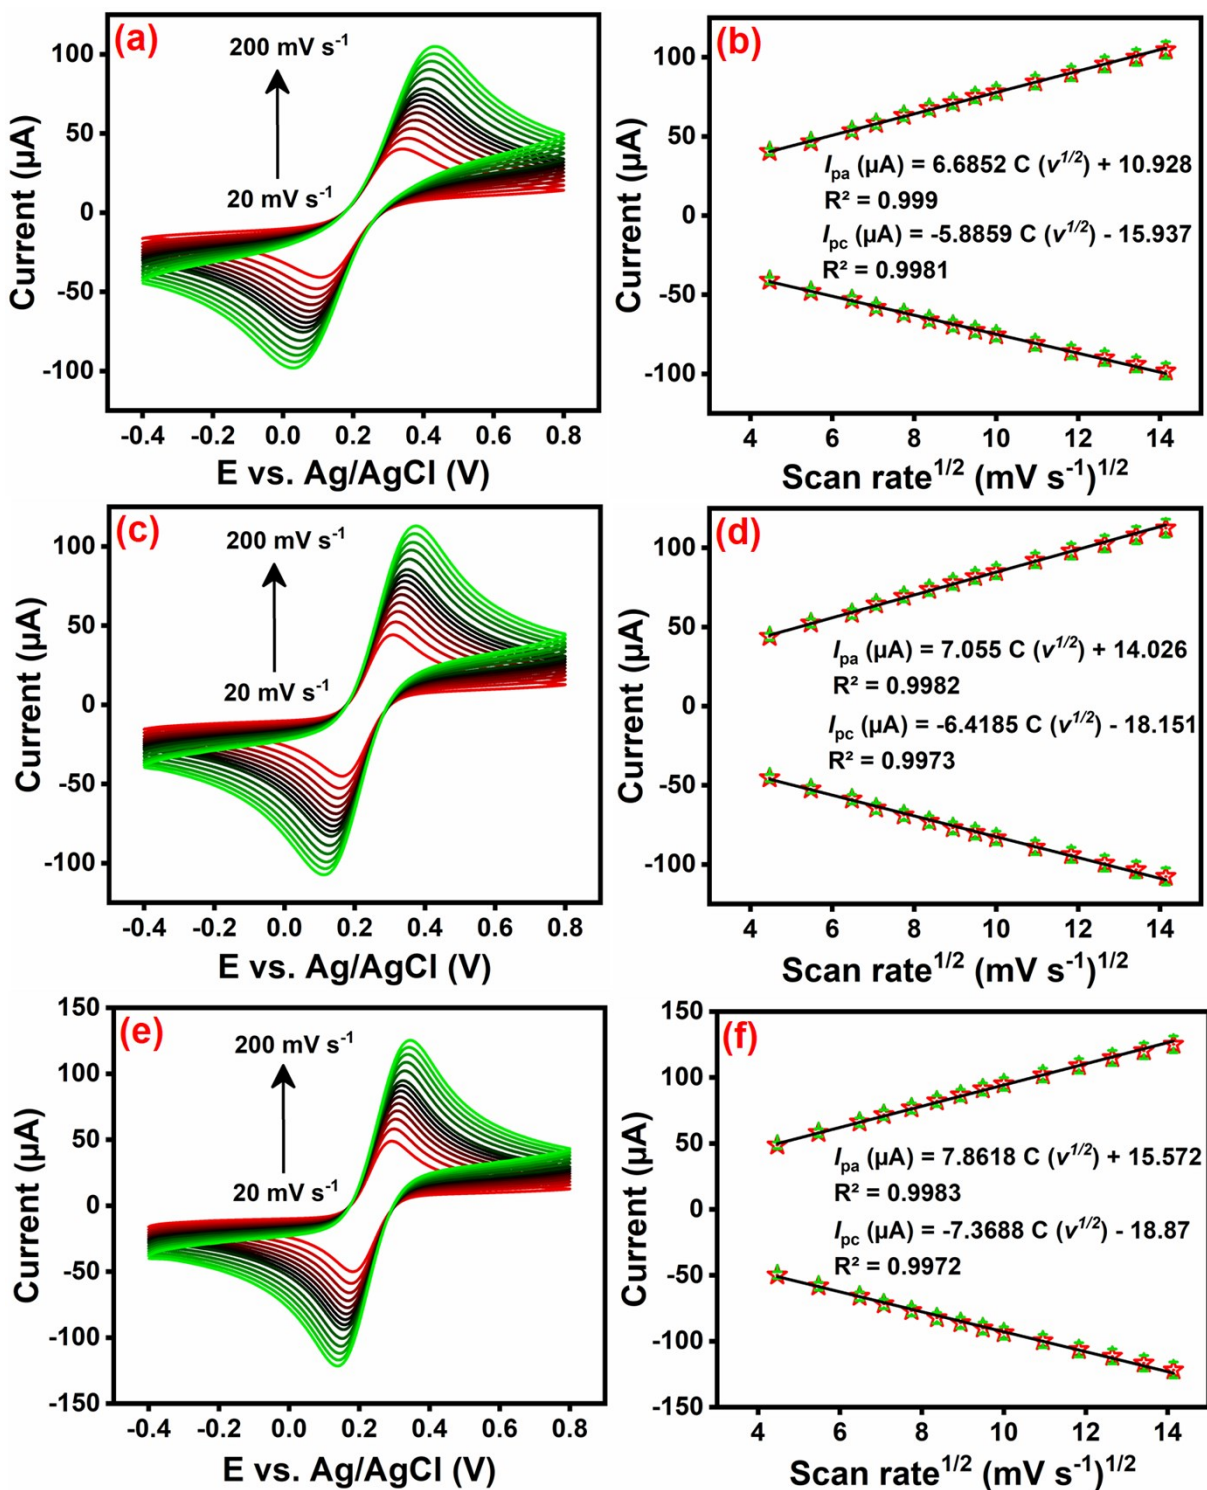

**Fig. S2.** The CV scan rates (from 20 to 200  $\text{mV s}^{-1}$ ) of (a)  $\text{SnO}_2/\text{SPCE}$ , (c)  $\text{Co}_3\text{O}_4/\text{GCE}$ , (e)  $\text{Co}_3\text{O}_4/\text{SnO}_2/\text{GCE}$ , and (c,d,f) plots show redox peak current *versus* square root of the scan rate. All the measurements were performed by 5.0 mM  $[\text{Fe}(\text{CN})_6]^{3-/4-}$  in KCl (0.1 M) solution.

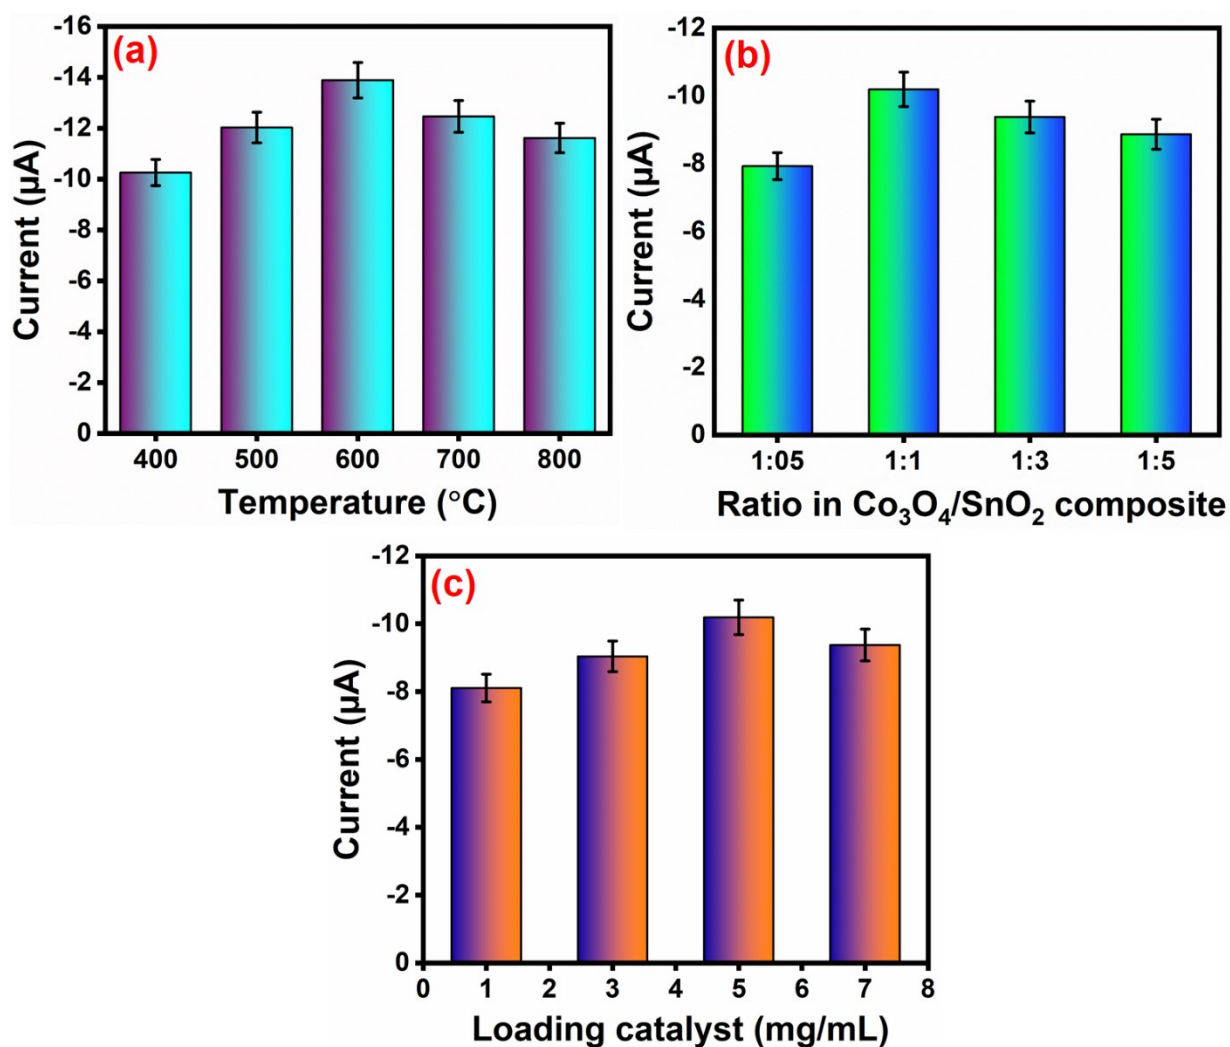

**Fig. S3.** (a) Temperatures variation of  $\text{Co}_3\text{O}_4/\text{SnO}_2$  composite in 300  $\mu\text{M}$  ODZ, (b) different concentration ratio of  $\text{SnO}_2$  in composite towards detection of 200  $\mu\text{M}$  of ODZ, and (c) various loading catalyst such as 1.0, 3.0, 5.0, and 7.0 mg/mL of  $\text{Co}_3\text{O}_4/\text{SnO}_2$  composite for ODZ (200  $\mu\text{M}$ ). All the CV experiments were conducted in 0.05 M PBS (pH = 7.0) at 50  $\text{mV s}^{-1}$ .

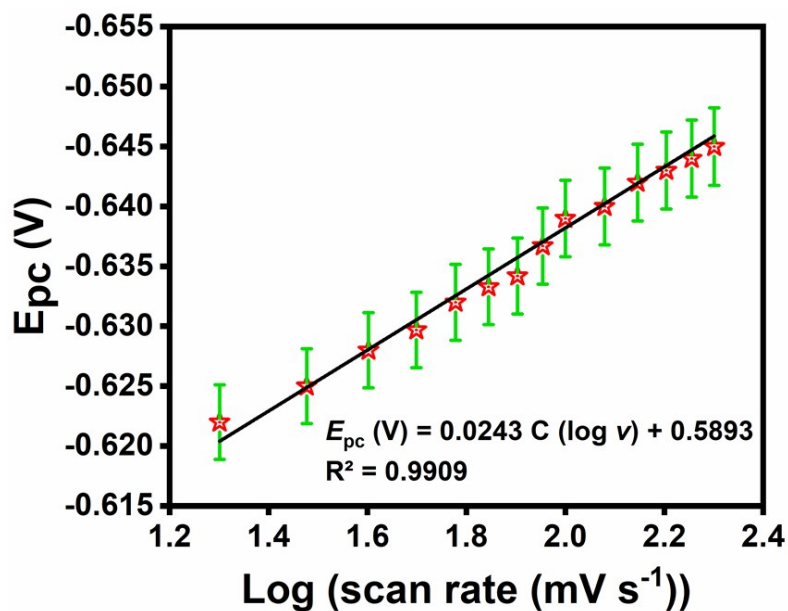

**Fig. S4.** Linear plot of reduction peak potential ( $E_{pc}$ ) versus logarithmic of scan rate ( $\log v$ ).

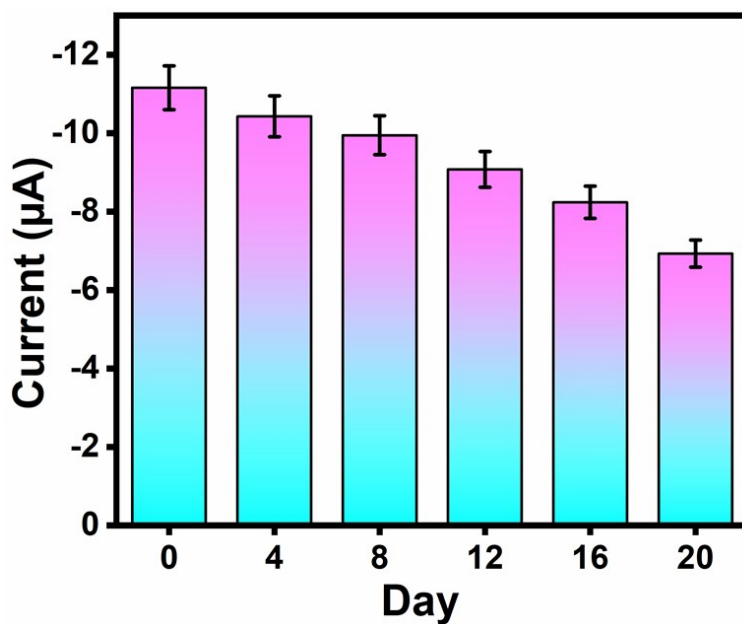

**Fig. S5.** Storage stability (over 20 days) at the  $\text{Co}_3\text{O}_4/\text{SnO}_2/\text{GCE}$  in the presence of 200  $\mu\text{M}$  ODZ using 0.05 M phosphate buffer solution (pH = 7.0) at the potential scan rate of 50  $\text{mV s}^{-1}$ .
